1 **Sex-biased gene expression in *Drosophila melanogaster* is constrained by**  
2 **ontogeny and genetic architecture**

3

4 FC Ingleby <sup>1\*</sup>, CL Webster <sup>1</sup>, TM Pennell <sup>1</sup>, I Flis <sup>1,2</sup>, EH Morrow <sup>1</sup>

5

6 1. Evolution, Behaviour and Environment Group, School of Life Sciences,  
7 University of Sussex, John Maynard Smith Building, Falmer, Brighton, UK

8

9 2. Edward Grey Institute, Department of Zoology, University of Oxford, Oxford,  
10 UK

11

12 \*Corresponding author:

13 Email: [f.ingleby@sussex.ac.uk](mailto:f.ingleby@sussex.ac.uk)

14 Telephone: +44 (0) 1273 678 559

15

16 **Sexual dimorphism is predicted to be constrained by the underlying**  
17 **genetic architecture shared between the sexes and through ontogeny, but**  
18 **whole-transcriptome data for both sexes across genotypes and**  
19 **developmental stages are lacking. Within a quantitative genetic**  
20 **framework, we sequenced RNA from *Drosophila melanogaster* at different**  
21 **developmental stages to examine sex-biased gene expression and how**  
22 **selection acts upon it. We found evidence that gene expression is**  
23 **constrained by both univariate and multivariate shared genetic variation**  
24 **between genes, sexes and developmental stages, but may be resolved by**  
25 **differential splicing. These results provide a comprehensive picture of how**  
26 **conflict over sexual dimorphism varies through development and clarifies**  
27 **the conditions under which it is predicted to evolve.**  
28

29 Sexual dimorphism is widespread across animals and plants, and is likely to have  
30 evolved in response to the different reproductive roles of the sexes within a  
31 species <sup>1</sup>. However, in most species, the majority of genes are shared between  
32 males and females, and sex-specific fitness optima for shared traits can create  
33 conflict, called intralocus sexual conflict <sup>2</sup>. Intralocus sexual conflict is driven by  
34 sexually antagonistic selection, which pushes the phenotypic value of the trait in  
35 different directions. It is therefore thought that sexually antagonistic selection  
36 leads to the evolution of sexual dimorphism and ultimately the resolution of  
37 conflict, by allowing each sex to express the trait independently and to each  
38 achieve their optimum phenotype <sup>3,4</sup>.

39

40 For sexually dimorphic phenotypes to develop from the same genes, we might  
41 expect differences in gene expression (or in downstream modifications and  
42 regulation) between the sexes at some stage of development <sup>5,6</sup>. Sexually  
43 dimorphic gene expression, or sex-biased gene expression, has been examined in  
44 detail in a wide-range of species <sup>7</sup>. But, although it is known that there can be  
45 substantial variation in gene expression between developmental stages, less is  
46 understood about the sex-specific dynamics of gene expression throughout  
47 development <sup>6,8,9</sup>. This is a potentially significant gap in our knowledge in the  
48 face of evidence that gene expression during early development can strongly  
49 impact on adult phenotype <sup>10,11</sup>, as can the early environment more generally <sup>12-</sup>  
50 <sup>15</sup>.

51

52 In terms of understanding how sex-biased gene expression relates to sexual  
53 conflict and conflict resolution, very few studies have directly associated sex  
54 differences in gene expression with sex-specific fitness <sup>16,17</sup>. Furthermore, our  
55 understanding of how the transcriptome is related to fitness is largely based on  
56 adult gene expression, and little is known about how sex differences laid down  
57 during development might influence overall fitness. Further research is  
58 necessary to synthesise a comprehensive picture of how sex-biased gene  
59 expression might mediate sexual conflict. We argue that a quantitative genetic  
60 and developmental perspective will provide valuable insights into the genetics  
61 and ontogeny of conflict and resolution, by enabling genetic covariance across

62 sexes and developmental stages to be quantified and by testing the association of  
63 these patterns of gene expression with fitness.

64

65 Here, we present the first quantification of a transcriptome across sexes,  
66 developmental stages and genotypes, and interpret the variation in gene  
67 expression in terms of sex-specific fitness. We demonstrate widespread sex-  
68 biased gene expression in *Drosophila melanogaster* larvae, pupae and adults, as  
69 well as considerable differences in the fitness consequences of gene expression  
70 throughout development. We combine this developmental perspective with a  
71 quantitative genomic approach that has been used increasingly in recent  
72 research<sup>16-19</sup>. By analysing gene expression in different genetic lines, we find  
73 evidence for potential constraints on conflict resolution through genetically  
74 correlated gene expression between genes, across sexes and across  
75 development. Importantly, we use multivariate analyses alongside our univariate  
76 analyses, to account for genetic covariance between different genes, an aspect  
77 that is overlooked in more common univariate analyses of gene expression. In  
78 addition, although our data does not allow full examination of all potential  
79 downstream modifications to gene expression, we do explore a potential route  
80 for conflict resolution via differential splicing between males and females. In  
81 sum, our results offer new insight into the genetics of sex differences in gene  
82 expression throughout development, and how these differences could mediate  
83 sexual conflict.

84

85 **RESULTS**

86 RNA was extracted from male and female third-instar larvae, pupae and adults  
87 from each of 10 hemiclinal lines, and gene expression was quantified by RNA-  
88 sequencing. Each hemiclinal line is generated through a series of crosses<sup>17</sup> that  
89 result in each fly within a line (both males and females) sharing a haplotype that  
90 is expressed alongside a random haplotype from the base population, allowing  
91 additive genetic variation to be estimated for each trait. We examined the  
92 expression of 14008 genes in total, of which 13501, 13602 and 13495 genes  
93 were expressed in larvae, pupae and adults respectively. Sex-specific fitness for  
94 each hemiclinal line (hereafter referred to as a 'line') was measured as  
95 reproductive success under competitive conditions.

96

97 **Sex-biased and sexually antagonistic gene expression**

98 Initial analyses partitioned variance in the expression of each gene within each  
99 stage between sex, line and sex-by-line effects. Table 1A summarises the  
100 numbers of sex-biased genes at each stage (significant 'sex' term at FDR<0.001).  
101 Sex-biased expression was generally high throughout development (83.4% and  
102 78.7% of larval and pupal genes, respectively), and highest in adults, with 89.9%  
103 of genes showing significant differences in expression between adult males and  
104 females. In larvae and pupae, sex-biased gene expression is predominantly male-  
105 biased, but in adults there are more equal numbers of female- and male-biased  
106 genes (Table 1A). Imposing the additional criteria of a fold change >2 reduces the  
107 numbers of genes called as sex-biased at each developmental stage, although this  
108 reduction is most noticeable in larvae and pupae, indicating that the magnitude  
109 of sex-biased expression is generally higher in adults (Table 1A).

110

111 From the same models, significant genetic (between-line) and sex-specific  
112 genetic (sex\*line) variation were identified at FDR<0.05 (Table 1B). The  
113 numbers of genes with significant genetic variation increased throughout  
114 development, from approximately a fifth of all genes tested in larvae, to just over  
115 a third of all genes tested in adults. Notably, sex-by-line variation - which  
116 indicates some extent of genetic variation for sex differences in gene expression -  
117 was very low in larvae (1.4%), but higher in adults (15.1%) and considerably

118 higher in pupae (22.1%), suggesting a higher capacity for the evolution of  
119 sexually dimorphic gene expression in pupae. In a species with a holometabolous  
120 life cycle like *D. melanogaster*, the pupae represent the most dynamic phase of  
121 development in terms of tissue differentiation and the development of sex-  
122 specific phenotypes, whereas the larval stage mostly concerns growth rather  
123 than differentiation, regardless of sex. Although the samples were carefully  
124 staged, pupal metamorphosis is such a dynamic developmental stage that we  
125 cannot rule out the possibility that genetic variation for gene expression is  
126 confounded with genetic differences in the precise timing and process of  
127 metamorphosis. Nonetheless, the particularly high level of sex-specific genetic  
128 variation in pupae shows that we identified significant genetic variation for sex  
129 differences in pupal metamorphosis, consistent with our other findings.

130

131 Candidate sexually antagonistic genes were identified by regressing fitness  
132 against gene expression, where a significant sex\*fitness interaction (FDR<0.05)  
133 was used to call candidate sexually antagonistic (SA) genes, and a significant  
134 fitness term in the model (FDR<0.05), with a non-significant sex\*fitness  
135 interaction, interpreted here as sexually concordant (SC) fitness consequences  
136 (Table 1C). Overall numbers of fitness-associated genes (SA and SC combined)  
137 were highest in pupae, which consisted predominantly of SC genes. Numbers of  
138 SA candidate genes were highest in adults (9.6% of genes tested) and lowest in  
139 pupae (4.5%). The overlap in SA and SC calls between stages was low (Figure 1),  
140 suggesting that both forms of selection vary widely throughout development. For  
141 all tests of sex-biased expression, overall genetic variation, and fitness  
142 association, genes are identified in Supplementary File 1.

143

144 Across development, 2571 genes (18.4% of the total 14008 genes tested  
145 throughout development) were identified as SA candidate genes in at least one  
146 developmental stage, suggesting a higher overall level of conflict throughout the  
147 genome than estimated from analyses of adult gene expression alone in the same  
148 laboratory population over five years previously<sup>17</sup>. Notably, even within the  
149 adult subset of our data, there was low and non-significant overlap (approx.  
150 10%) between the genes that were called as SA candidates compared to the

151 genes called as SA candidates previously<sup>17</sup>. Studies like these capture a snapshot  
152 of sexually antagonistic fitness variation at a given time point, but it appears that  
153 conflict and resolution are dynamic<sup>17,20</sup>.

154

### 155 **Modules of correlated gene expression**

156 In an attempt to simplify a complex, whole-transcriptome dataset and identify  
157 patterns of potential functional interest, we identified modules of correlated  
158 gene expression among the fitness-related genes (SA and SC combined) within  
159 each developmental stage. First, we calculated genetic correlations for each  
160 pairwise combination of fitness-related genes for both sexes within each stage,  
161 and used the mean absolute value of the correlations for each gene with all other  
162 genes as a measure of gene 'connectivity'<sup>16</sup>. Average connectivity was generally  
163 high, and highest in adults (Figure 2). In larvae and adults, connectivity was  
164 significantly higher for SA genes than for SC genes, but the opposite was true in  
165 pupae, although the absolute difference was small (Figure 2).

166

167 Next, we inferred functionality by using the pairwise correlations calculated  
168 above to cluster the fitness-associated genes into transcription modules within  
169 each stage<sup>21</sup>. We tested these modules for enrichment with SA candidate genes  
170 at each stage, and tested the largest modules (>100 genes) for enrichment with  
171 tissue-specific genes identified from the FlyAtlas database<sup>22</sup> of larval and adult  
172 tissues (results in Supplementary File 2). There were 27 transcription modules  
173 identified in larvae, 5 of which were significantly enriched with larval SA  
174 candidate genes at FDR<0.05 (Figure 3A). A large larval transcription module  
175 (#11 in Figure 3A) was enriched for both SA candidate genes as well as salivary  
176 gland and malpighian tubule-specific genes, suggesting this module may be  
177 associated with feeding, and that larval feeding behaviour might have SA fitness  
178 consequences. In pupae, there were 56 transcription modules, of which only 4  
179 were significantly enriched for pupal SA candidates (Figure 3B). The clustering  
180 results for pupal fitness-associated genes were dominated by one large  
181 transcription module (#36 in Figure 3B). This module, similarly to the largest  
182 transcription module in larvae (#27 in Figure 3A), was enriched for a variety of  
183 different tissue-specific genes, all from somatic rather than germ line tissues. In

184 adults, we found 36 transcription modules, of which 8 were enriched with adult  
185 SA candidate genes (Figure 3C). Modules #5, 6 and 9 were heavily enriched with  
186 testes-specific genes, whereas modules #11 and 19 were enriched for multiple  
187 tissue-specific sets of genes, including a combination of head, brain and CNS  
188 tissue-specific genes, suggesting a putative link between behaviour and sex-  
189 specific fitness. These results are consistent with previous research that has  
190 demonstrated sexual conflict over adult locomotory behaviour in *D.*  
191 *melanogaster*<sup>23</sup>. Module #19 was also significantly enriched with adult SA  
192 candidate genes, and so these transcription modules may harbour interesting  
193 candidate genes for further research (Figure 3C).

194

### 195 **Shared quantitative genetic variation**

196 To explore the potential for genetic constraints to hinder the resolution of sexual  
197 conflict over gene expression, we measured quantitative genetic variation  
198 underlying gene expression. In particular, we were interested in shared genetic  
199 variation between sexes and between developmental stages, as this shared  
200 genetic variation could prevent the independent evolution of sex- and stage-  
201 specific gene expression.

202

203 Initially, we considered genetic variation from a univariate perspective. For each  
204 gene with significant genetic variation in at least one developmental stage  
205 (N=8761), we ran a model that partitioned variance in gene expression between  
206 sex, stage and line, creating a 6x6 genetic variance-covariance matrix for each  
207 gene individually (2 sexes x 3 stages), as shown inset in Figures 4A-D. This  
208 matrix can be split into four sources of variance: (1) sex- and stage-specific  
209 genetic variance (Figure 4A), (2) between-sex genetic covariance within each  
210 stage (Figure 4B), (3) between-stage genetic covariance within each sex (Figure  
211 4C), and (4) genetic covariance between both sexes and stages (Figure 4D).

212 Covariance estimates were scaled to the total amount of genetic variation in the  
213 full matrix. Overall, genes that were identified as SA in at least one stage had  
214 significantly more sex- and stage-specific genetic variation than genes that were  
215 not SA in any stage of development (Figure 4A). This was expected, as theory  
216 predicts that SA selection will help maintain genetic variation<sup>3,4</sup>. There is also



217 substantial shared genetic variation both between sexes and between stages, and  
218 interestingly this is significantly higher for SA genes than non-SA genes in all  
219 instances (Figures 4B-D). Notably, there is even evidence of considerable shared  
220 genetic variation between-sex and between-stage (Figure 4D), suggesting  
221 complex genetic covariance of gene expression across males and females at  
222 different developmental stages. The results of these models were also used to  
223 calculate the intersexual genetic correlation,  $r_{mf}$ , for each gene at each stage. As  
224 might be expected from the results of overall between-sex genetic covariance  
225 shown in Figure 4B,  $r_{mf}$  is higher for SA genes than non-SA genes at each stage,  
226 although this difference is small in pupae (Figure 5).

227

228 Next, we used multivariate analyses of quantitative genetic variation, combined  
229 with a re-sampling technique, to examine shared genetic variation between-sex  
230 and between-gene. This involved calculating the full genetic variance-covariance  
231 matrix for sub-samples of genes expressed in males and females ( $\mathbf{G}_{mf}$ , or  $\mathbf{G}$   
232 matrix). The  $\mathbf{G}$  matrix includes the sub-matrix  $\mathbf{B}$ , which summarises between-sex  
233 and between-gene genetic covariance<sup>24</sup> (see Supplementary File 3). We  
234 estimated the average  $\mathbf{G}$  matrix for SA and SC genes for larvae, pupae and adults  
235 independently. Overall, we found that  $\mathbf{B}$  tended to have a higher magnitude for  
236 SA genes than for SC genes in larvae and adults, indicating that there is higher  
237 between-sex and between-gene genetic covariance in SA genes. The opposite  
238 was true for pupae (Figure 6A), consistent with the patterns of connectivity for  
239 SA genes compared with SC genes in Figure 2. We also estimated the matrix  
240 correlation between the upper and lower halves of the  $\mathbf{B}$  matrix, and found that  
241 this was significantly higher for SA genes than for SC genes at each  
242 developmental stage (Figure 6B), although this difference was small in pupae.  
243 This shows that genetic covariances are more strongly correlated between sexes  
244 for SA than for SC genes, implying more potential for male and female gene  
245 expression to evolve independently in SC genes.

246

247 Finally, we used the multivariate breeder's equation<sup>24</sup> to estimate the vectors of  
248 the predicted response to selection for males and females for SA and SC genes.  
249 We then use the angle between these vectors as a measure of the predicted

250 divergence between male and female trait evolution. When the between-sex,  
251 between-gene shared genetic variation in **B** is included in these calculations, the  
252 divergence between the sexes tends to decrease, as shared genetic variation  
253 forces the predicted response to selection between the sexes to realign with one  
254 another to some extent. However, this realignment is stronger for SA than SC  
255 genes in larvae (Figure 6C), pupae (Figure 6D) and especially in adults (Figure  
256 6E), suggesting that the multivariate between-sex genetic covariance within **B**  
257 presents a significant constraint on the independent evolution of the sexes,  
258 particularly in adults.

259

### 260 **Evidence for differential splicing**

261 Differential splicing was examined by comparing splicing between male and  
262 female samples within each developmental stage, for all genes with evidence of  
263 alternative isoform expression. There was most evidence of differential splicing  
264 between the sexes in adults, where 1089 genes out of 2822 genes tested (38.6%)  
265 showed significant differential splicing between sexes (FDR<0.05). Evidence for  
266 significant sex-specific splicing in larvae (0.9%, 14/1636) and pupae (3.8%,  
267 77/2015) was low. However, the overall extent of differential splicing (measured  
268 as the square root of the Jensen-Shannon distance between the male and female  
269 splicing distributions, see methods) was higher in non-SA genes than for SA  
270 genes (Figure 7A-C), although this difference was generally small and only  
271 significant in larvae (Figure 7A). We also found that genes with a high  
272 intersexual genetic correlation tended to exhibit lower levels of differential  
273 splicing between the sexes (Figure 7D). The negative correlation between  $r_{mf}$  and  
274  $\sqrt{J_{S(m,f)}}$  was significant for larvae ( $r^2=-0.070$ ,  $P=0.007$ ) and adults ( $r^2=-0.081$ ,  
275  $P<0.001$ ) but not for pupae ( $r^2=-0.038$ ,  $P=0.110$ ).

276

277 **DISCUSSION**

278 Our results clearly demonstrate that although the developmental transcriptome  
279 of *D. melanogaster* exhibits high levels of sexual dimorphism, sexual conflict over  
280 the expression of shared genes persists. In fact, 18.4% of the genes tested were  
281 identified as sexually antagonistic candidates in at least one stage of  
282 development, implying that this dimorphism is not a signature of fully resolved  
283 conflict. Furthermore, our analyses provide a detailed account of how conflict  
284 could be mediated at the level of the transcriptome, as we find evidence for a  
285 number of different sources of constraint that could prevent conflict resolution,  
286 as well as finding evidence to support one specific mechanism of resolution.

287  
288 First, the overall patterns of sex-specific selection and sex-specific genetic  
289 variation - the two main ingredients necessary for independent trait evolution  
290 between the sexes<sup>25</sup> - vary considerably throughout development. Here, we used  
291 lifetime reproductive success (LRS) to estimate selection on genes at each stage.  
292 From an evolutionary perspective, LRS provides arguably the most relevant  
293 approximation of fitness: selection will favour individuals who leave behind the  
294 most offspring (i.e. have the highest LRS). If there is a significant correlation  
295 between LRS and the pre-adult expression of a particular gene, then it suggests  
296 that the gene might contribute to an aspect of development that affects LRS. Sex-  
297 specific selection on gene expression appears inconsistent from one  
298 developmental stage to the next, with very little overlap between genes that  
299 were identified as either SA or SC across stages. This is perhaps unsurprising  
300 given previous research that has demonstrated changes in sex-specific selection  
301 through development using different experimental approaches<sup>9,26</sup>. The numbers  
302 of genes with significant sex-specific genetic variation also varied across  
303 development, and were especially low in larvae and, to some extent, adults,  
304 limiting the potential for independent evolution between the sexes at these  
305 stages.

306  
307 Second, the results revealed potential genetic constraints on conflict resolution  
308 that stemmed from several sources of shared genetic variation: between-gene,  
309 between-sex and between-stage, and sometimes a combination of these. Even if

310 there is considerable overall genetic variation for gene expression, if this genetic  
311 variation is not independent between contexts where the gene is under different  
312 selection, then adaptive evolution of gene expression can be constrained. It is  
313 unlikely that any gene would be expressed completely independently<sup>19,27</sup>;  
314 however, the extent of genetic covariance is almost always significantly higher  
315 for SA genes than it is for SC genes, strongly supporting the idea that this shared  
316 genetic variation could prevent conflict resolution. The exception to this was that  
317 gene connectivity was significantly lower for pupal SA genes than for pupal SC  
318 genes, and similarly, between-sex and between-gene multivariate shared genetic  
319 variation in the **B** matrix was lower for pupal SA than SC genes. This may result  
320 from the unusual modularity of the pupal transcriptome, where most fitness-  
321 related genes clustered into a single large, highly correlated gene module that  
322 consisted predominantly of SC fitness-related genes.

323

324 Consistent with previous research<sup>28</sup>, univariate between-sex genetic covariance  
325 and the intersexual genetic correlation is higher for SA genes than for non-SA  
326 genes in our data, indicating a putative constraint of genetic variation shared  
327 between the sexes within developmental stages. However, the multivariate  
328 analyses in this study provide additional insight into between-sex and between-  
329 gene genetic covariance that has previously been overlooked. Genetic covariance  
330 within the **B** matrix seems particularly influential in adults, where the constraint  
331 imposed by **B** on the independent evolution of SA genes between the sexes is  
332 high. The results highlight the instability of the genetic covariance in **B** across  
333 development, and emphasise the usefulness of a multivariate perspective to  
334 examine trait evolution in a more realistic, multi-gene context.

335

336 Of particular interest was the amount of shared genetic variation between both  
337 sex and stage. This genetic covariance indicates that the expression of a gene in,  
338 for example, male larvae, is not independent of the expression of the same gene  
339 in, for example, adult females. Since the fitness consequences for a particular  
340 gene are unlikely to be aligned between two different sexes and developmental  
341 stages, this could be a source of genetic constraint. This genetic covariance has  
342 not, to our knowledge, previously been measured for gene expression, but it

343 might be expected that such covariance would be relatively low and unimportant  
344 due to the intuitively weak link between different sexes and stages. In fact, this  
345 covariance is of a similar magnitude to the other sources of genetic covariance  
346 that were measured, and, also similarly to the other genetic covariance  
347 components, it is significantly higher in SA than non-SA genes. This could have  
348 implications for antagonistic pleiotropy between developmental stages <sup>6,29,30</sup>,  
349 suggesting that such relationships might be sex-specific. We also find higher  
350 genetic covariance identified for SA genes between stages within each sex than  
351 for non-SA genes, supporting a link between developmental antagonistic  
352 pleiotropy and sexual conflict <sup>6</sup>. Given the magnitude of between-stage, and  
353 between-sex/between-stage, genetic covariance measured here, developmental  
354 genetics could have important consequences for conflict resolution. Such  
355 developmental covariance has been studied outside of the sexual conflict  
356 literature <sup>31</sup>, but this is clearly also relevant to sexual conflict and the evolution  
357 of sexual dimorphism.

358

359 Finally, we present some limited evidence to support the idea that a lack of  
360 differential splicing between sexes might also hinder conflict resolution.  
361 Previous research has considered a role of sex-specific splicing <sup>32,33</sup> or  
362 differential exon usage and duplication <sup>34</sup> in allowing the sexes to achieve  
363 differential expression from a shared gene. Consistent with this, we find firstly  
364 that larval SA genes have significantly less evidence of sex-specific splicing  
365 patterns than non-SA genes, and secondly that the intersexual genetic  
366 correlation and the extent of sex-specific splicing are significantly negatively  
367 associated in larvae and adults - i.e. genes with more shared quantitative genetic  
368 variation between the sexes also exhibit less evidence of sex-specific splicing  
369 patterns. This indicates another potential genetic constraint on the independent  
370 expression of shared genes between the sexes.

371

372 We have therefore identified multiple routes through which conflict resolution  
373 could be constrained or facilitated. The novel developmental perspective of this  
374 quantitative genomic data is particularly interesting not only because it allowed  
375 us to identify genetic covariance between stages, but also because it highlights

376 the different dynamics of sexual conflict at each stage, and the potential to  
377 underestimate the extent of conflict or resolution by focussing on only one stage.  
378 In short, the larval and adult stages appear to be characterised by conflict and  
379 constraint on sex-specific phenotypes, whereas there is less evidence of this in  
380 pupae. This is attributable to a complex combination of constraints on larvae and  
381 adults that ultimately result in the transcriptome being less independent  
382 between the sexes. Since the pupae undergo dramatic metamorphosis and  
383 differentiation, compared to the relatively stable larvae and adults, it seems  
384 likely that strong selection on the metamorphic process for the formation of  
385 optimised sex-specific phenotypes via tissue differentiation may have lead to  
386 more extensive conflict resolution in pupae. Indeed, these results are in line with  
387 previous work on *D. melanogaster*, which demonstrated some of the most  
388 dynamic patterns of gene expression at the start and end of the pupal stage <sup>8</sup>,  
389 indicating that this developmental stage may have evolved a more flexible  
390 transcriptome to allow for sex-specific metamorphosis, in contrast to larval and  
391 adult stages that are characterised by tissue growth and maintenance,  
392 respectively. A holometabolous life cycle allows, to some extent, for a discrete  
393 phase of concentrated differentiation between the sexes, with potential for some  
394 aspects of development to become uncoupled across metamorphosis <sup>35</sup>. Since  
395 this phase is absent in hemimetabolous insects, and in other animals more  
396 generally, there is potential for conflict to be more prominent during  
397 development in other species. It is clear that constraints on conflict resolution  
398 are likely to result from a combination of different sources, making the evolution  
399 of conflict resolution a complex problem, not least one that appears unlikely to  
400 be consistent even throughout the life cycle.  
401

402 **METHODS**

403 Hemiclonal haplotypes were sampled from a *D. melanogaster* base population  
404 (LH<sub>M</sub>) that had been maintained in the laboratory for more than 500 generations  
405 as a large outbred population with overlapping generations. Haplotypes were  
406 expressed as male or female hemiclonal individuals following a series of crosses  
407 <sup>17,26</sup>. All flies were reared on a standard molasses diet at 25°C and 65% relative  
408 humidity, with a 12:12h light:dark incubator cycle.

409  
410 Male and female flies used for the parental cross were allowed to interact and  
411 mate for 48h before the males were removed and females were flipped into  
412 lightly yeasted laying vials. Females oviposited in these vials for 2h before being  
413 flipped into a holding vial. Females were given further 2h laying periods in fresh  
414 vials after 4 and 7 days, creating staged vials of developing offspring. For each set  
415 of vials, larvae were visually inspected under a dissecting microscope after 4  
416 days, when developing testes can be seen through the larval body wall. Larvae  
417 were split into sex-specific vials to continue development, with 10 larvae per  
418 vial. Eleven days after the initial laying vials were set up, third instar larvae,  
419 pupae and 1-day old virgin adults (unable to mate as they eclosed in sex-specific  
420 vials) were harvested. Individuals were frozen at -80°C and sample processing  
421 took place over the course of 4 weeks.

422  
423 RNA extractions were carried out on individual larvae/pupae/adults using  
424 TRIzol (Invitrogen) according to the manufacturer's instructions (adjusted  
425 protocol for a small amount of starting material). Our aim was to sequence RNA  
426 from 180 samples in total, comprising males and females from three  
427 developmental stages from each of 10 hemiclonal lines, with three biological  
428 replicates per sample type. However, the hemiclone cross produces siblings that  
429 do not have the hemiclonal genotype, which are identified as adults with *bw* eye  
430 colour among wild-type hemiclonal flies. We therefore carried out additional  
431 identification steps for larval and pupal samples, and collected more than twice  
432 the number of samples required in order to compensate for non-hemiclonal  
433 genotypes. After the initial RNA extraction process (but prior to DNase  
434 treatment), a subsample of the extract from larvae/pupae was used in PCR

435 reactions to identify the correct genotypes. Two PCR reactions were carried out:  
436 one set of primers was designed for the dominant insertion mutation in the *bw*  
437 gene, *bw<sup>D</sup>* (F: CTTATCTTTGGAGAGAAGAGA; R: GGATCATCCGTGCATCAAGAC),  
438 and the other set for the male fertility factor *kl5* on the Y chromosome (F:  
439 GCTGCCGAGCGACAGAAAATAATGACT; R:  
440 GTCCCAGTTACGGTTCGGGTTCCATTGT), to make sure the sexes had been  
441 identified correctly by phenotype. Primers to a region on chromosome 2R were  
442 used as a control reaction (F: AAAAGGTACCCGCAATATAACCCAATAATTT; R:  
443 GTCCCAGTTACGGTTCGGGTTCCATTGT). Control and Y chromosome primer  
444 sequences were taken from Lott et al. <sup>36</sup>.

445  
446 After the genotypes had been identified, DNase digestion was carried out on the  
447 correct samples, and RNA was suspended in RNase-free water. Library  
448 preparation (Illumina TruSeq RiboZero) and Illumina HiSeq sequencing was  
449 carried out by AROS Applied Biotechnology (Aarhus, Denmark) according to  
450 Illumina v.4 protocols, using 30 sequencing lanes with 6 samples per lane. For  
451 each sample, 400ng of total RNA was used and 32-49M reads were achieved per  
452 sample. Gene expression data were aligned to the FlyBase version r6.05 of the *D.*  
453 *melanogaster* genome <sup>37</sup> and normalised within the R (v3.2.1) BioConductor  
454 'QuasR' and 'DESeq' pipeline <sup>38</sup>. At this stage, samples were checked for the *bw*  
455 gene and the fertility factor *kl5*, and one sample was removed due to having been  
456 incorrectly genotyped prior to sequencing (a male pupa had been incorrectly  
457 assigned as a female pupa from one of the hemiclinal lines), leaving 179 samples  
458 for analysis. The alignment generated read counts for 16727 genes. The dataset  
459 was filtered to remove low variance genes, leaving 14008 genes, of which 13501,  
460 13602 and 13495 were expressed in larvae, pupae and adults respectively.

461  
462 Sex-specific fitness data was recorded as hemiclinal line averages of male and  
463 female total reproductive success under competitive conditions, as described in  
464 assays in previous studies <sup>17,26</sup>. Fitness data was analysed as relative fitness by  
465 dividing line-specific fitness means by the maximum average fitness for each sex.  
466



467 **Sex-biased and fitness-associated gene expression.** Variation in the read  
468 counts for each gene was partitioned in a generalised linear mixed model using  
469 the ‘glmer’ function in the R package ‘lme4’<sup>39</sup> across sex, line and sex-by-line  
470 terms. Initially, a separate model was performed for each gene at each  
471 developmental stage. This was due to the difficulties in model convergence  
472 trying to run a full model (which would require sex-by-line-by-stage-by-fitness  
473 effects) with data from only 10 genetic lines. Models assumed a Poisson  
474 distribution and included ID as a random term to account for differences in total  
475 number of reads per sample. The significance of variance components was  
476 calculated from a  $0.5X_0^2+0.5X_1^2$  mixture distribution from a likelihood ratio test  
477 comparing the full model with the reduced model (without the component being  
478 tested), and *P* values were adjusted according to the false discovery rate (FDR)<sup>40</sup>  
479 including the full set of results from all three developmental stages (since most  
480 genes were tested at every stage). We then tested if each gene was associated  
481 with fitness at each stage, using a GLMM under the same conditions as before but  
482 with sex, fitness and fitness\*sex. A significant fitness\*sex interaction was  
483 interpreted as sexually antagonistic (SA) selection, whereas a significant overall  
484 fitness term, with a non-significant fitness\*sex interaction, was interpreted as  
485 sexually concordant (SC) selection.

486  
487 **Transcription modules.** We began by calculating the genetic correlation  
488 between all pairwise combinations of fitness-related (both SA and SC combined)  
489 genes separately in larvae (N=1261), pupae (N=3103) and adults (N=2959). The  
490 absolute correlations were used to examine overall gene connectivity (average of  
491 all absolute pairwise correlations per gene at each stage), and were then used in  
492 a clustering algorithm to identify gene modules<sup>21</sup>. This algorithm works via an  
493 optimisation function that finds a pattern of gene modules that maximises  
494 correlation within modules while minimising correlation between modules. Each  
495 of the identified modules was tested for enrichment with SA genes using  
496 hypergeometric tests (*P* values adjusted for FDR). Next, we identified tissue-  
497 specific genes for larval and adult tissues using the FlyAtlas *D. melanogaster*  
498 microarray database<sup>22</sup>, and tested modules for enrichment with tissue-specific  
499 genes. These tests could only be carried out on modules with >100 genes due to

500 sample size issues. Again, hypergeometric tests were used and P values were  
501 FDR-adjusted.

502

503 **Quantitative genetic analyses.** In order to estimate the full univariate between-  
504 sex and between-stage genetic variance-covariance matrix for each gene, we  
505 used the 'MCMCglmm' package <sup>41</sup> in R to partition variance in gene expression  
506 for the 14008 genes that varied in expression at any stage. The posterior  
507 distribution for each model was estimated using weakly informative inverse-  
508 Wishart priors for the variance components ( $V=\text{diag}(6)/6$ ,  $\nu=6$ ) and  
509 convergence was visually inspected with diagnostic plots. The models included  
510 stage and sex as fixed terms, and partitioned genetic variance across a 6x6  
511 matrix for each gene, with female- and male-specific larval, pupal and adult  
512 genetic variance and all possible covariances. The posterior distribution of these  
513 models was used for all univariate quantitative genetic aspects of the analysis.  
514 We calculated the intersexual genetic correlation,  $r_{mf}$ , from the posterior  
515 estimates of variance components <sup>42</sup>; and used the absolute sum of the relevant  
516 variance components (scaled to the total amount of genetic variation in the full  
517 matrix) to compare the amount of between-sex and/or between-stage shared  
518 genetic variation across SA and non-SA genes.

519

520 We also examined shared genetic variation between-sex and between-gene for  
521 each developmental stage independently. Ideally, this would involve running a  
522 multivariate model with expression variance for all genes partitioned between  
523 sex and line. However, this would involve estimating a genetic variance-  
524 covariance matrix (**G** matrix) with more than 5 million parameters. Instead, we  
525 ran 2000 iterations of a multivariate model that randomly sampled 5 genes at a  
526 time, and, using the expression of the 5 genes as a multivariate response,  
527 partitioned gene expression variance between sex and line. Each model was ran  
528 using 'MCMCglmm' <sup>41</sup> in R, with sex:gene as fixed terms, sex:gene:line as random  
529 terms, and sex- and gene-specific residuals. The prior specified a weakly  
530 informative inverse-Wishart distribution for the variance components  
531 ( $V=\text{diag}(10)/10$ ,  $\nu=10$ ), and model checks were carried out as above. Each  
532 iteration of the model generated a posterior distribution of a 10x10 **G** matrix (5

533 genes expressed in 2 sexes). We repeated the analysis for six subsets of genes,  
534 which were exclusive within each developmental stage: SA and SC genes in  
535 larvae, pupae and adults. Results are summarised from the average **G** matrix  
536 calculated from the posterior distribution of all 2000 model iterations.  
537 Importantly, this **G** matrix represents the full **G<sub>mf</sub>** matrix, including the sub-  
538 matrix **B**, which summarises the between-sex and between-gene covariance (see  
539 Supplementary File 3 for details). We examined genetic variation within **B** using  
540 two metrics. First,  $\|\mathbf{B}\|$ , the matrix norm was calculated to approximate the  
541 magnitude of the variation within **B**. The matrix norm was used instead of the  
542 matrix trace (that has been used previously to estimate the amount of variance  
543 in **G**) since the **B** sub-matrix is composed entirely of covariance estimates and  
544 can therefore have negative eigenvalues on the main diagonal. Note, however,  
545 that using the sum of the absolute eigenvalues of **B** (i.e. the **B** matrix trace)  
546 produces qualitatively identical results. Second, the matrix correlation between  
547 the upper and lower halves of **B** was calculated to estimate symmetry of variance  
548 within **B**. Finally, we implemented the multivariate breeder's equation:

549  $\Delta\bar{z} = \frac{1}{2}\mathbf{G}\beta$  (Lande 1980). This equation uses the product of the genetic variation

550 in **G** and the vector of linear selection gradients in  $\beta$  to calculate a vector of the  
551 predicted response to selection for each trait,  $\Delta\bar{z}$ . We generated a vector of  
552 linear selection gradients that corresponded to each estimate of the **G** matrix in  
553 the models described above. For each iteration of the **G** matrix model, selection  
554 gradients for the same 5 genes were estimated from a multiple linear regression  
555 of the genes against relative fitness for males and females, following Lande <sup>24</sup>.  
556 This allowed us to calculate sex-specific  $\Delta\bar{z}$  based on the sex-specific  
557 components of **G** and  $\beta$ . This calculation was carried out using the distribution of  
558 2000 estimates, to create a distribution of  $\Delta\bar{z}$  estimates, from which confidence  
559 intervals could be used to assess significant differences.

560

561 Finally, to include **B** in the calculation of  $\Delta\bar{z}$ , the multivariate breeder's equation  
562 <sup>24</sup> can be expanded as:

563

564 
$$\begin{pmatrix} \Delta\bar{z}_{mB} \\ \Delta\bar{z}_{fB} \end{pmatrix} = \frac{1}{2} \begin{pmatrix} \mathbf{G}_m & \mathbf{B} \\ \mathbf{B}^T & \mathbf{G}_f \end{pmatrix} \begin{pmatrix} \beta_m \\ \beta_f \end{pmatrix} \quad (1)$$

565

566 where  $\Delta\bar{z}_{mB}$  and  $\Delta\bar{z}_{fB}$  represent the predicted response to selection of each sex  
567 given both the sex-specific genetic variation in  $\mathbf{G}_m$  and  $\mathbf{G}_f$  and the shared genetic  
568 variation within  $\mathbf{B}$ . The predicted divergence between the male and female  
569 response to selection was measured as the angle between male and female  $\Delta\bar{z}$ ,  
570 with and without  $\mathbf{B}$ . The angle was calculated as:

571

572 
$$\theta = \cos^{-1} \left( \frac{\Delta\bar{z}_f \cdot \Delta\bar{z}_m}{\|\Delta\bar{z}_f\| \|\Delta\bar{z}_m\|} \right) \quad (2)$$

573 with  $\Delta\bar{z}_{mB}$  and  $\Delta\bar{z}_{fB}$  substituted for the calculations accounting for shared genetic  
574 variation in  $\mathbf{B}$ . As before, all calculations used the distribution of 2000 estimates  
575 from the original models to enable confidence interval calculation and  
576 significance testing.

577

578 **Differential splicing.** We used the cuffdiff function in Cufflinks software <sup>43</sup> to  
579 test for evidence of differential splicing between males and females at each stage.  
580 This test runs for any gene where alternative isoform expression is found, which  
581 in this dataset tested 1636, 2015 and 2822 genes in larvae, pupae and adults  
582 respectively. The analysis uses the Jensen-Shannon distribution to test for  
583 significant differential splicing between the male and female samples within each  
584 developmental stage.

585

586 **Accession codes.** RNA-seq data have been deposited with accession SRP068235

587

588 **ACKNOWLEDGEMENTS**

589 This work was supported by grants from the Swedish Research Council (2011-  
590 3701), European Research Council (#280632), and a Royal Society University  
591 Research Fellowship (all to E.H.M). The authors thank M. Reuter for his  
592 comments on an earlier draft of the manuscript.

593

594 **AUTHOR CONTRIBUTIONS**

595 F.C.I. and E.H.M. wrote the paper and designed the experiments. T.M.P. and I.F.  
596 set up the hemiclone lines and collected fitness data. F.C.I. and C.L.W. collected  
597 the samples and performed the molecular work. F.C.I. performed the statistical  
598 analyses.

599

- 600 1. Darwin, C. *The descent of man and selection in relation to sex* (John  
601 Murray, London, UK, 1871)
- 602 2. Rice, W.R. Sex chromosomes and the evolution of sexual dimorphism.  
603 *Evolution* **38**:735-742 (1984)
- 604 3. Rice, W.R. & Chippindale, A.K. Intersexual ontogenetic conflict. *J. Evol. Biol.*  
605 **14**:685-693 (2001)
- 606 4. Bonduriansky R. & Chenoweth, S.F. Intralocus sexual conflict. *Trends Ecol.*  
607 *Evol.* **24**:280-288 (2009)
- 608 5. Connallon, T. & Knowles, L.L. Intergenomic conflict revealed by patterns  
609 of sex-biased gene expression. *Trends Genetics* **21**:495-499 (2006)
- 610 6. Ellegren, H. & Parsch, J. The evolution of sex-biased genes and sex-biased  
611 gene expression. *Nature Reviews* **8**:689-698 (2007)
- 612 7. Ingleby, F.C., Flis, I. & Morrow, E.H. Sex-biased gene expression and sexual  
613 conflict throughout development. *Cold Spring Harb. Perspect. Biol.*  
614 **7**:a017632 (2014)
- 615 8. Arbeitman, M.N. *et al.* Gene expression during the life cycle of *Drosophila*  
616 *melanogaster*. *Science* **297**:2270-2275 (2002)
- 617 9. Perry, J.C., Harrison, P.W. & Mank, J.E. The ontogeny and evolution of sex-  
618 biased gene expression in *Drosophila melanogaster*. *Mol. Biol. Evol.*  
619 **31**:1206-1219 (2014)
- 620 10. Sorensen, J.G. & Loeschcke, V. Larval crowding in *Drosophila melanogaster*  
621 induces Hsp70 expression, and leads to increased adult longevity and  
622 adult thermal stress resistance. *J. Insect Physiol.* **47**:1301-1307 (2001)
- 623 11. Fellous, S. & Lazzaro, B.P. Larval food quality affects adult (but not larval)  
624 immune gene expression independent of effects on general condition. *Mol.*  
625 *Ecol.* **19**:1462-1468 (2010)
- 626 12. Gilbert, S.F. Ecological developmental biology: developmental biology  
627 meets the real world. *Developmental Biol.* **233**:1-12 (2001)
- 628 13. Bochdanovits, Z., van der Klis, H. & de Jong, G. Covariation of larval gene  
629 expression and adult body size in natural populations of *Drosophila*  
630 *melanogaster*. *Mol. Biol. Evol.* **20**:1760-1766 (2003)

- 631 14. Wyman, M.J., Agrawal, A.F. & Rowe, L. Condition-dependence of the  
632 sexually dimorphic transcriptome in *Drosophila melanogaster*. *Evolution*  
633 **64**:1836-1848 (2010)
- 634 15. Runagall-McNaull, A., Bonduriansky, R. & Crean, A.J. Dietary protein and  
635 lifespan across the metamorphic boundary: protein-restricted larvae  
636 develop into short-lived adults. *Scientific Reports* **5**:11783 (2015)
- 637 16. Ayroles, J.F. *et al.* Systems genetics of complex traits in *Drosophila*  
638 *melanogaster*. *Nat. Genet.* **41**:299-307 (2009)
- 639 17. Innocenti, P. & Morrow, E.H. The sexually antagonistic genes of *Drosophila*  
640 *melanogaster*. *PLOS Biol.* **8**:e1000335 (2010)
- 641 18. Zhou, S., Campbell, T.G., Stone, E.A., Mackay, T.F.C. & Anholt, R.R.H.  
642 Phenotypic plasticity of the *Drosophila* transcriptome. *PLOS Genet.*  
643 **8**:e1002593 (2012)
- 644 19. Blows, M.W., Allen, A.L., Collet, J.M., Chenoweth, S.F. & McGuigan, K. The  
645 phenome-wide distribution of genetic variance. *Am. Nat.* **186**:15-30  
646 (2015)
- 647 20. Collet, J.M. *et al.* Rapid evolution of the inter-sexual genetic correlation for  
648 fitness in *Drosophila melanogaster*. BioRxiv pre-print, doi:  
649 <http://dx.doi.org/10.1101/032664> (2015)
- 650 21. Stone, E.A. & Ayroles, J.F. Modulated modularity clustering as an  
651 exploratory tool for functional genomic inference. *PLOS Genet.*  
652 **5**:e1000479 (2009)
- 653 22. Chintipalli, V.R., Wang, J. & Dow, J.A.T. Using FlyAtlas to identify better  
654 *Drosophila melanogaster* models of human disease. *Nat. Genet.* **39**:715-  
655 720 (2007)
- 656 23. Long, T.A.F. & Rice, W.R. Adult locomotory activity mediates intralocus  
657 sexual conflict in a laboratory-adapted population of *Drosophila*  
658 *melanogaster*. *Proc. R. Soc. Lond. B.* **274**:3105-3112 (2007)
- 659 24. Lande, R. Sexual dimorphism, sexual selection, and adaptation in  
660 polygenic characters. *Evolution* **34**:292-305 (1980)
- 661 25. Lande, R. & Arnold, S.J. The measurement of selection on correlated  
662 characters. *Evolution* **37**:1210-1226 (1983)

- 663 26. Chippindale, A.K., Gibson, J.R. & Rice, W.R. Negative genetic correlation for  
664 adult fitness between sexes reveals ontogenetic conflict in *Drosophila*.  
665 *Proc. Natl. Acad. Sci. USA* **98**:1671-1675 (2001)
- 666 27. Runcie, D.E. & Mukherjee, S. Dissecting high-dimensional phenotypes with  
667 Bayesian sparse factor analysis of genetic covariance matrices. *Genetics*  
668 **194**:753-767 (2013)
- 669 28. Griffin, R.M., Dean, R., Grace, J.L., Ryden, P. & Friberg, U. The shared  
670 genome is a pervasive constraint on the evolution of sex-biased gene  
671 expression. *Mol. Biol. Evol.* **30**:2168-2176 (2013)
- 672 29. Campisi, J. Cellular senescence as a tumor-suppressor mechanism. *Trends*  
673 *Cell Biol.* **11**:S27-S31 (2001)
- 674 30. Leroi, A.M. *et al.* What evidence is there for the existence of individual  
675 genes with antagonistic pleiotropic effects? *Mech. Ageing and Devel.*  
676 **126**:421-429 (2005)
- 677 31. Klingenberg, C.P. Morphological integration and developmental  
678 modularity. *Ann. Rev. Ecol. Evol. Syst.* **39**:115-132 (2008)
- 679 32. McIntyre, L.M. *et al.* Sex-specific expression of alternative transcripts in  
680 *Drosophila*. *Genome Biol.* **7**:R79 (2006)
- 681 33. Blekhman, R., Marioni, J.C., Zumbo, P., Stephens, M. & Gilad, Y. Sex-specific  
682 and lineage-specific alternative splicing in primates. *Genome Res.* **20**:180-  
683 189 (2010)
- 684 34. Connallon, T. & Clark, A.G. The resolution of sexual antagonism by gene  
685 duplication. *Genetics* **187**:919-937 (2011)
- 686 35. Aguirre, J.D., Blows, M.W. & Marshall, D.J. The genetic covariance between  
687 life cycle stages separated by metamorphosis. *Proc. R. Soc. Lond. B.*  
688 **281**:20141091 (2014)
- 689 36. Lott, S.E. *et al.* Noncanonical compensation of zygotic X transcription in  
690 early *Drosophila melanogaster* development revealed through single-  
691 embryo RNA-seq. *PLOS Biol.* **9**:e1000590 (2011)
- 692 37. dos Santos, G. *et al.* FlyBase: introduction of the *Drosophila melanogaster*  
693 release 6 reference genome assembly and large-scale migration of  
694 genome annotations. *Nucleic Acids Res.* doi: 10.1093/nar/gku1099 (2015)



- 695 38. Gaidatzis, D., Lerch, A., Hahne, F. & Stadler, M.B. QuasR: quantification and  
696 annotation of short reads in R. *Bioinformatics* **31**:1130-1132 (2015)
- 697 39. Bates, D., Machler, M., Bolker, B. & Walker, S. Fitting linear mixed-effects  
698 models using lme4 *ArXiv*:1406.5823 (2014)
- 699 40. Benjamini, Y. & Hochberg, Y. Controlling the false discovery rate: a  
700 practical and powerful approach to multiple testing. *J. R. Stat. Soc. B.*  
701 **57**:289-300 (1995)
- 702 41. Hadfield, J.D. MCMC methods for multi-response generalized linear mixed  
703 models: the MCMCglmm R package. *J. Stat. Software* **33**:1-22 (2010)
- 704 42. Lynch, M. & Walsh, B. *Genetics and Analysis of Quantitative Traits* (Sinauer  
705 Associates, Sunderland, MA, USA, 1998)
- 706 43. Trapnell, C. *et al.* Transcript assembly and quantification by RNA-seq  
707 reveals unannotated transcripts and isoform switching during cell  
708 differentiation. *Nat. Biotech.* **28**:511-515 (2010)
- 709

710 **TABLES AND FIGURES**

711

712 **Table 1.** Overall numbers of genes that were (A) significantly sex-biased, (B) had  
 713 significant between-line (genetic) and sex\*line (sex-specific genetic) variation,  
 714 and (C) significantly associated with sexually antagonistic (fitness\*sex) or  
 715 sexually concordant (fitness with no fitness\*sex interaction) fitness. All results  
 716 are taken from the linear models described in the text. In total, 13501, 13602  
 717 and 13495 genes were tested for larvae, pupae and adults respectively. The  
 718 percentages of these totals are shown italicised in brackets.

|                                           | <b>Larvae</b> | <b>Pupae</b> | <b>Adults</b> |
|-------------------------------------------|---------------|--------------|---------------|
| <b>(A) Sex-biased</b>                     | 11262 (83.4)  | 10705 (78.7) | 12133 (89.9)  |
| <b>Sex-biased (fold change &gt; 2)</b>    | 4535 (33.6)   | 2613 (19.2)  | 8252 (61.2)   |
| <b>Female-biased</b>                      | 1200 (8.9)    | 3620 (26.6)  | 5696 (42.2)   |
| <b>Female-biased (fold change &gt; 2)</b> | 131 (1.0)     | 324 (2.4)    | 3525 (26.1)   |
| <b>Male-biased</b>                        | 10062 (74.5)  | 7085 (52.1)  | 6437 (47.7)   |
| <b>Male-biased (fold change &gt; 2)</b>   | 4404 (32.6)   | 2289 (16.8)  | 4727 (35.1)   |
| <b>(B) Genetic variation</b>              | 2870 (21.3)   | 4706 (34.6)  | 4912 (36.4)   |
| <b>Sex-specific genetic variation</b>     | 192 (1.4)     | 3110 (22.3)  | 2043 (15.1)   |
| <b>(C) Sexually antagonistic</b>          | 841 (6.2)     | 610 (4.5)    | 1300 (9.6)    |
| <b>Sexually concordant</b>                | 420 (3.1)     | 2493 (18.3)  | 1659 (12.3)   |

719

720 **Figure 1.** Venn diagrams of the overlap between (A) sexually antagonistic and  
 721 (B) sexually concordant candidate genes called in larvae (L), pupae (P) and  
 722 adults (A). In total, 2571 genes were SA in at least one stage (18.4% of the 14008  
 723 genes tested), and 4148 genes were SC in at least one stage (29.6%).

724

725 **Figure 2.** Connectivity of all fitness-related genes for each stage, as the average  
 726 absolute genetic correlation of all pairwise gene combinations within each stage.  
 727 White boxes represent the overall connectivity for all fitness-related genes in  
 728 larvae (L), pupae (P) and adults (A). Smaller boxes represent connectivity of  
 729 sexually antagonistic (dark grey) and sexually concordant (pale grey) genes  
 730 separately. Numbers of genes included in each box are shown. Notches in

731 boxplots represent 95% CI approximations, as  $\pm 1.58 \cdot \text{IQR} / \sqrt{N}$ . Asterisks indicate  
732 significance of the difference between SA/SC genes at each stage.

733

734 **Figure 3.** Modules of correlated gene expression for all fitness-related genes in  
735 (A) larvae (N=1261); (B) pupae (N=3103); and (C) adults (N=2959). Colours  
736 within modules represent genetic correlations between all pairwise  
737 combinations of genes; colours between modules represent the average genetic  
738 correlation between modules. Outlined modules are those that tested significant  
739 for enrichment with sexually antagonistic genes. Numbered modules are those  
740 with >100 genes that were tested for enrichment with tissue-specific genes.

741

742 **Figure 4.** Histograms of the between-sex and between-stage genetic variance-  
743 covariance matrix components for individual genes, partitioned between  
744 variance components as shown in the inset matrix diagrams. (A) Sum of the sex-  
745 specific, stage-specific genetic variance. (B) Sum of the absolute values of the  
746 between-sex genetic covariance within each stage. (C) Sum of the absolute values  
747 of the between-stage genetic covariance within both sexes. (D) Sum of the  
748 absolute values of the between-sex, between-stage genetic covariance. Only  
749 genes with significant genetic variance for at least one developmental stage are  
750 included (N=8761). Genes that are sexually antagonistic in at least one stage  
751 (N=2056) are shown in dark grey and genes that are not SA at any stage are  
752 shown in pale grey (N=6705). Notches in boxplots represent  $\pm 1.58 \cdot \text{IQR} / \sqrt{N}$ .  
753 Asterisks indicate significance of the difference between SA/non-SA genes at  
754 each stage.

755

756 **Figure 5.** Intersexual genetic correlation ( $r_{mf}$ ) for sexually antagonistic (dark  
757 grey) and non-sexually antagonistic (pale grey) genes in larvae (L), pupae (P)  
758 and adults (A). Only genes with significant genetic variation at each stage are  
759 shown, and the numbers of genes included in each box are shown. Notches in  
760 boxplots represent  $\pm 1.58 \cdot \text{IQR} / \sqrt{N}$ . Asterisks indicate significance of the  
761 difference between SA/non-SA genes at each stage.

762

763 **Figure 6.** Genetic variation in the average **B** matrix (between-sex and between-  
764 gene) for SC and SA genes in larvae (L), pupae (P) and adults (A). (A) The **B**  
765 matrix norm,  $||\mathbf{B}||$ , as a measure of the overall magnitude of genetic variation in  
766 **B** for SC (pale grey) and SA (dark grey) genes at each stage. Boxes represent the  
767 estimates from all 2000 iterations of the model, notches in boxplots represent  
768  $\pm 1.58 \cdot \text{IQR} / \sqrt{N}$ , and asterisks indicate significant difference between SA/SC  
769 genes at each stage. (B) The symmetry of the **B** matrix, as the matrix correlation  
770 between the two halves of **B**, for SC (pale grey) and SA (dark grey) genes at each  
771 stage. Boxes represent the estimates from all 2000 iterations of the model,  
772 notches in boxplots represent  $\pm 1.58 \cdot \text{IQR} / \sqrt{N}$ , and asterisks indicate significance  
773 of the difference between SA/SC genes at each stage. (C-E) The angle between  
774 the male and female predicted response to selection without the **B** matrix (solid  
775 arrows) and adjusted for the inclusion of the **B** matrix (dashed arrow) for SC  
776 (pale grey) and SA (dark grey) genes in larvae (C), pupae (D) and adults (E).  
777

778 **Figure 7.** Evidence for differential splicing between males and females in (A)  
779 larvae (1636 genes tested); (B) pupae (2015 genes); and (C) adults (2822 genes),  
780 as histograms of the square root of the Jensen-Shannon distance. Sexually  
781 antagonistic genes are shown in dark grey; non-sexually antagonistic genes in  
782 pale grey. The numbers of sexually antagonistic genes tested was generally low  
783 (151, 63 and 306 genes respectively for larvae, pupae and adults). Notches in  
784 boxplots represent  $\pm 1.58 \cdot \text{IQR} / \sqrt{N}$ . Asterisks indicate significance of the  
785 difference between SA/non-SA genes at each stage. (D) The square root of the  
786 Jensen-Shannon distance plotted against the intersexual genetic correlation ( $r_{mf}$ )  
787 for larvae (green points), pupae (red) and adults (blue).  
788

789 **SUPPLEMENTARY MATERIAL**

790

791 **Supplementary File 1.** List of Entrez Gene IDs tested at each developmental  
792 stage, annotated with results of significance tests for fitness association, sex-  
793 biased expression and genetic variation.

794

795 **Supplementary File 2.** Results from analysis of gene clusters. Gene modules and  
796 connectivity of genes within modules are given for each fitness-associated (SA or  
797 SC) gene at each developmental stage (identified by Entrez Gene IDs). Results of  
798 hypergeometric tests (adjusted for  $FDR < 0.05$ ) for cluster enrichment with (A) SA  
799 genes and (B) tissue-specific genes are also provided.

800

801 **Supplementary File 3.** Summary of the structure of the full  $\mathbf{G}$  matrix,  $\mathbf{G}_{mf}$ , and  
802 how it was used in the multivariate analyses.

**A.**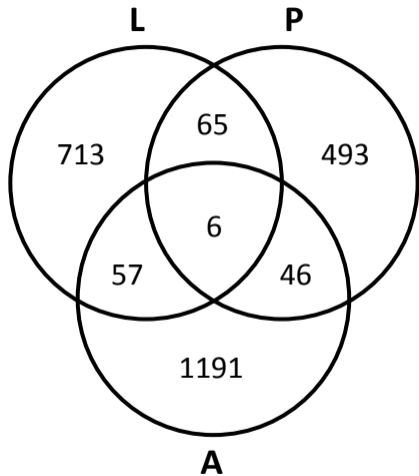**B.**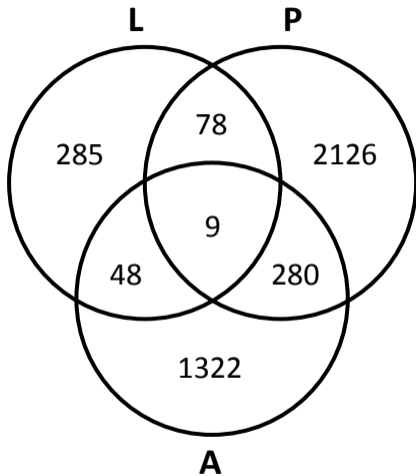

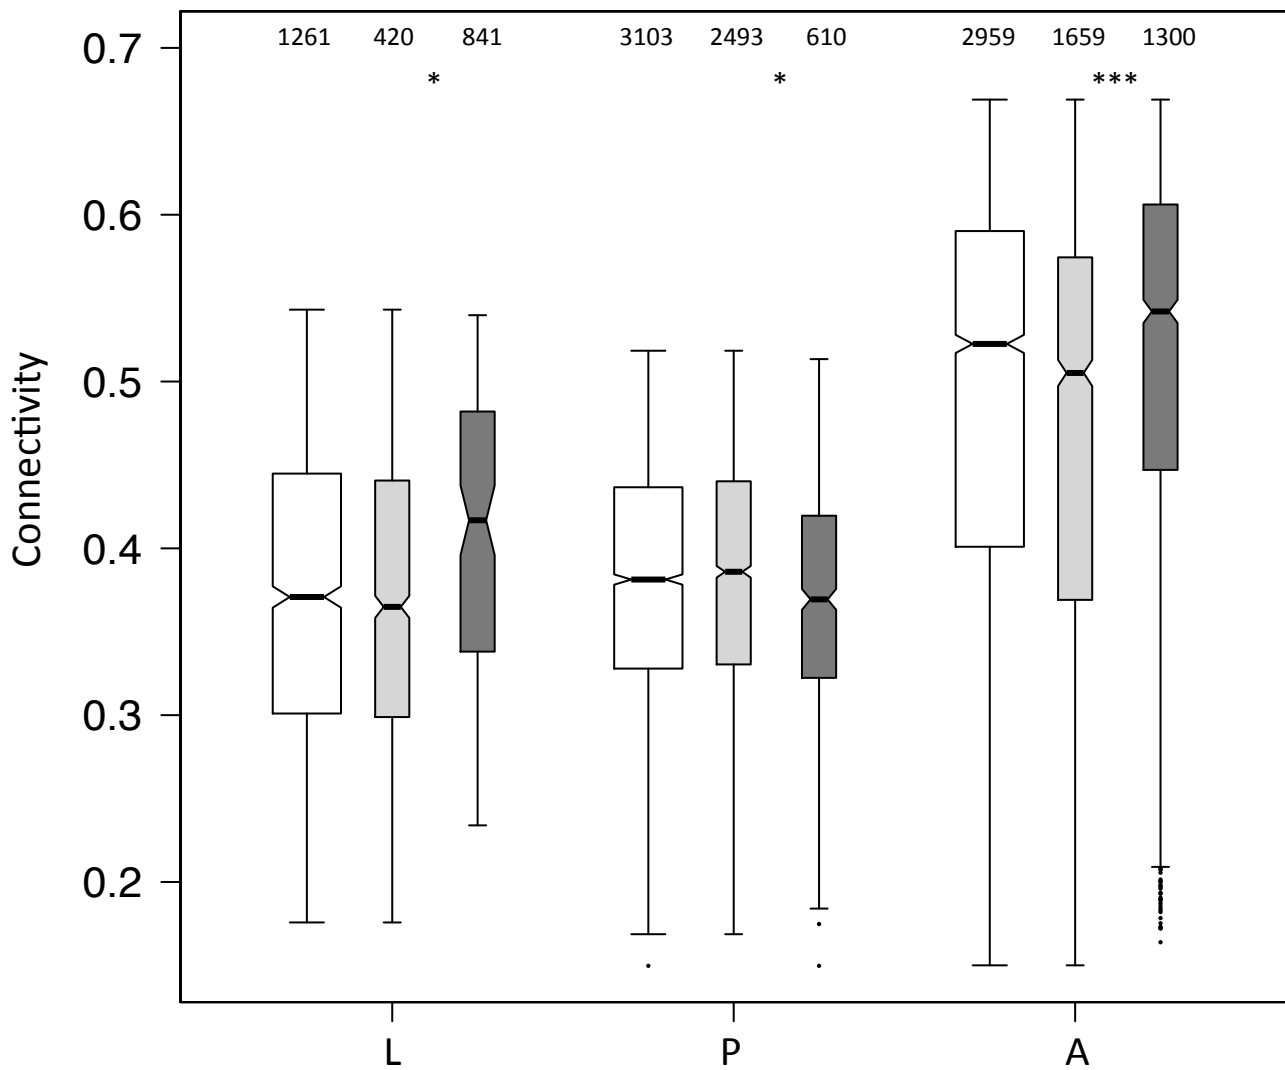

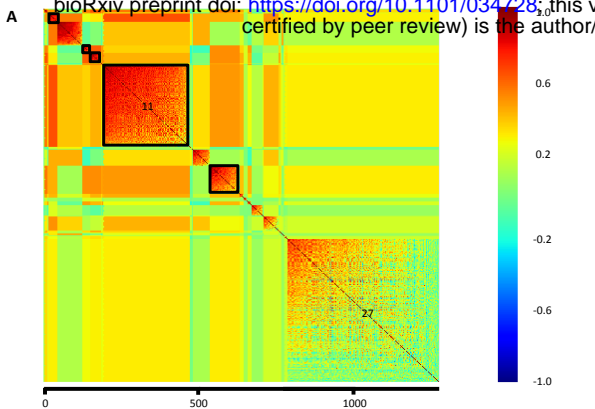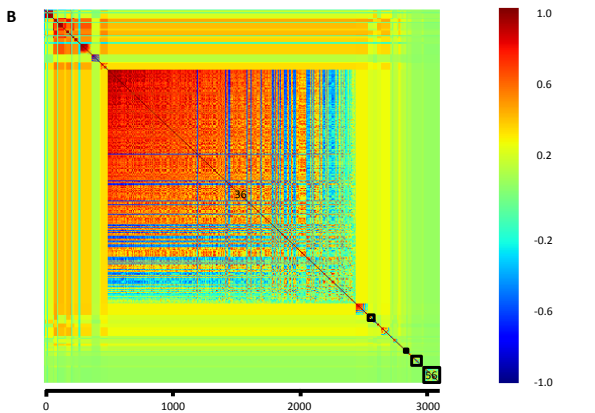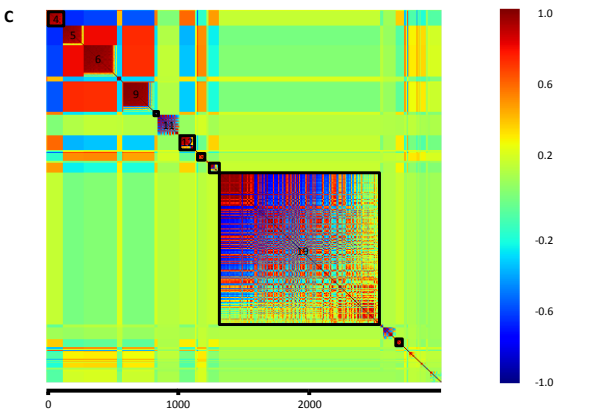



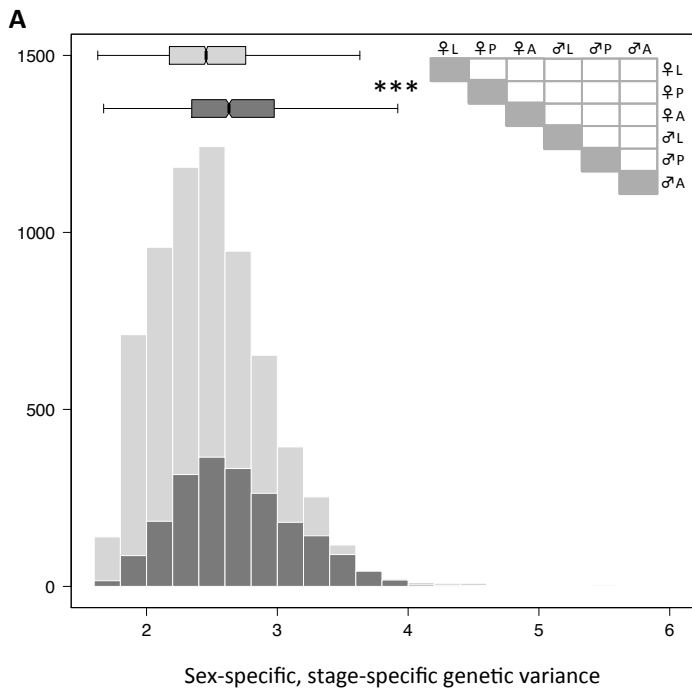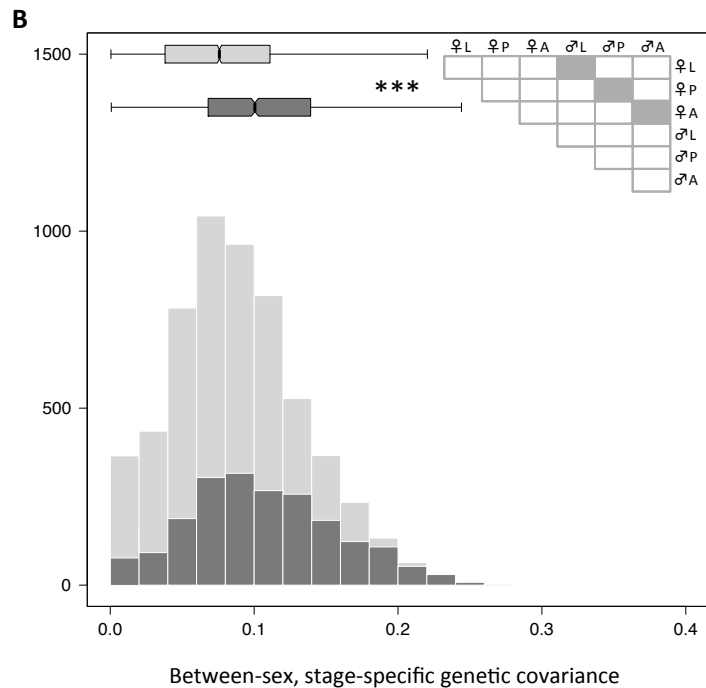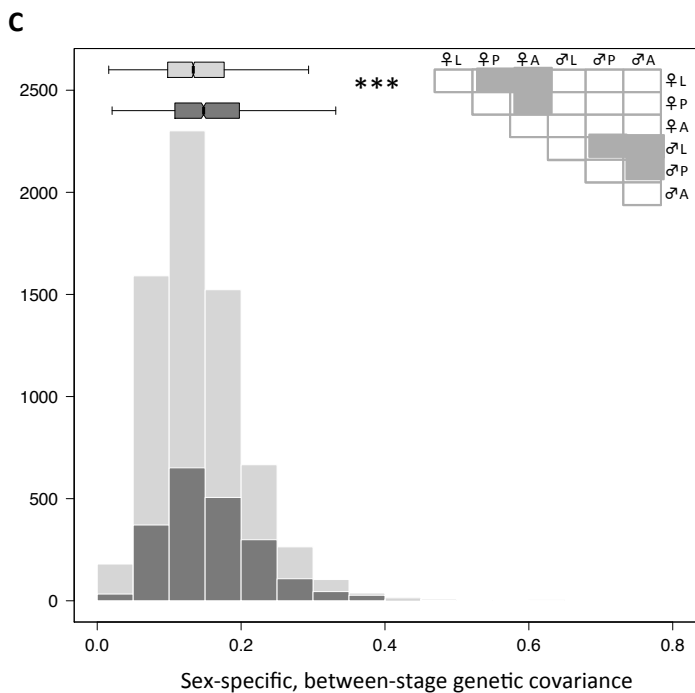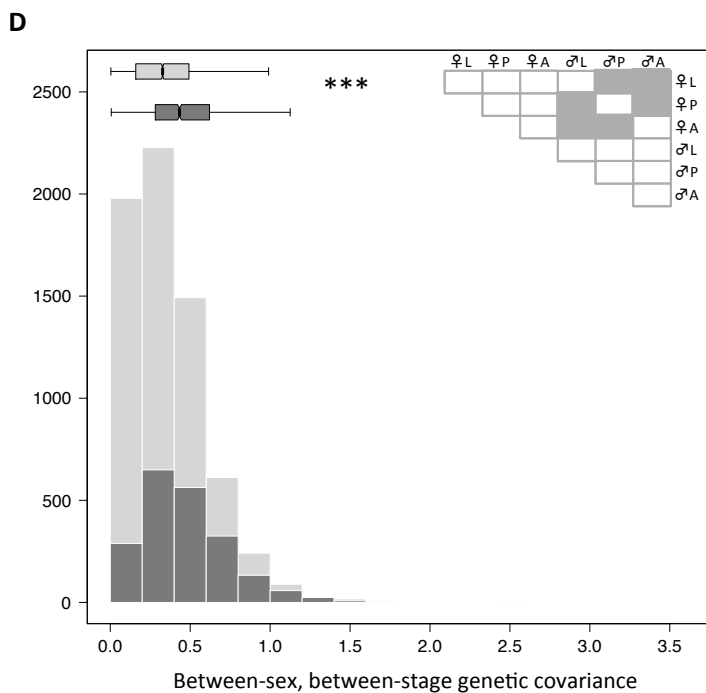

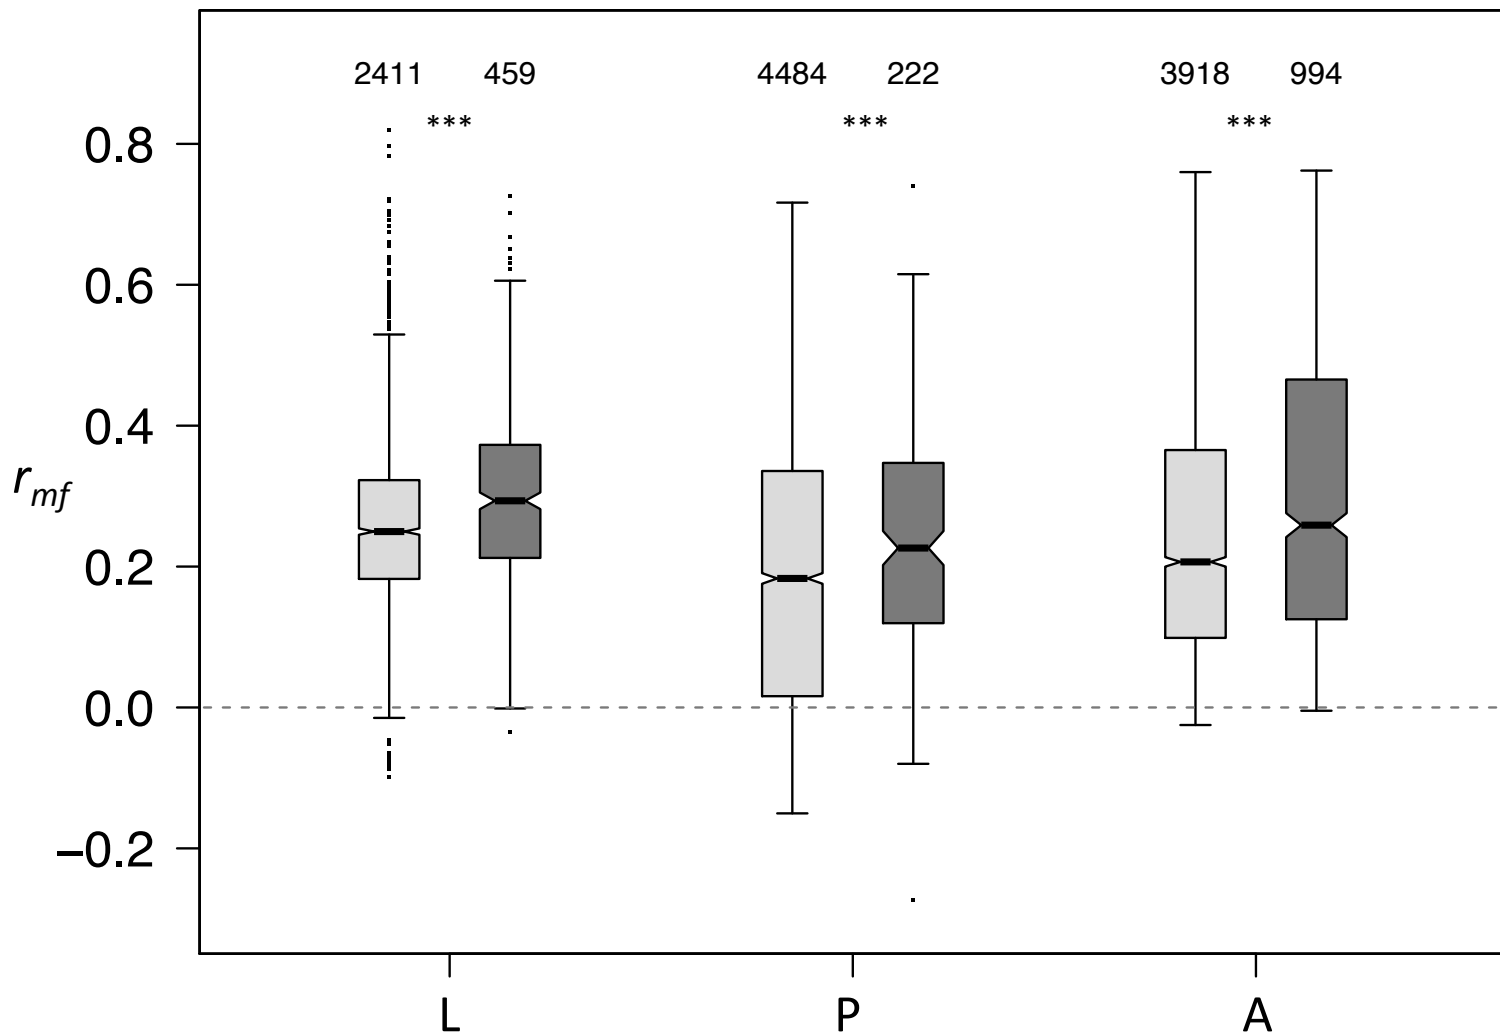

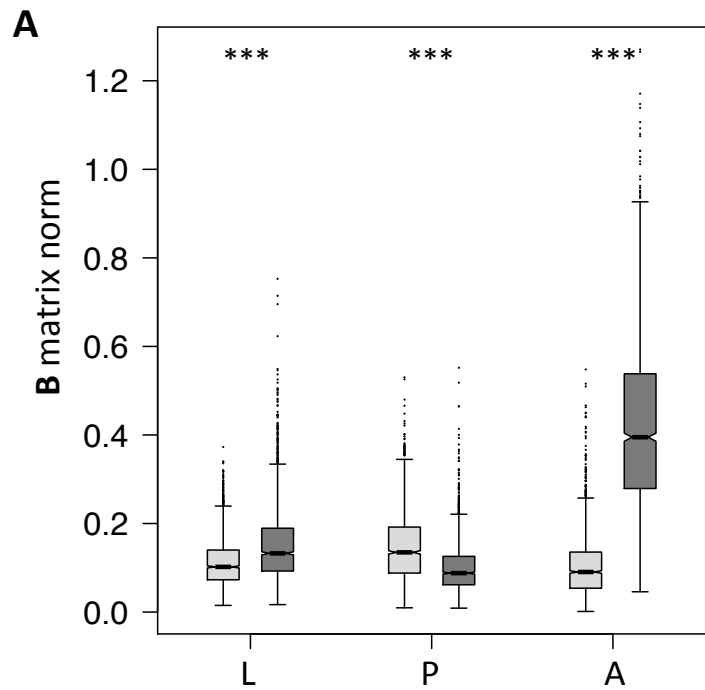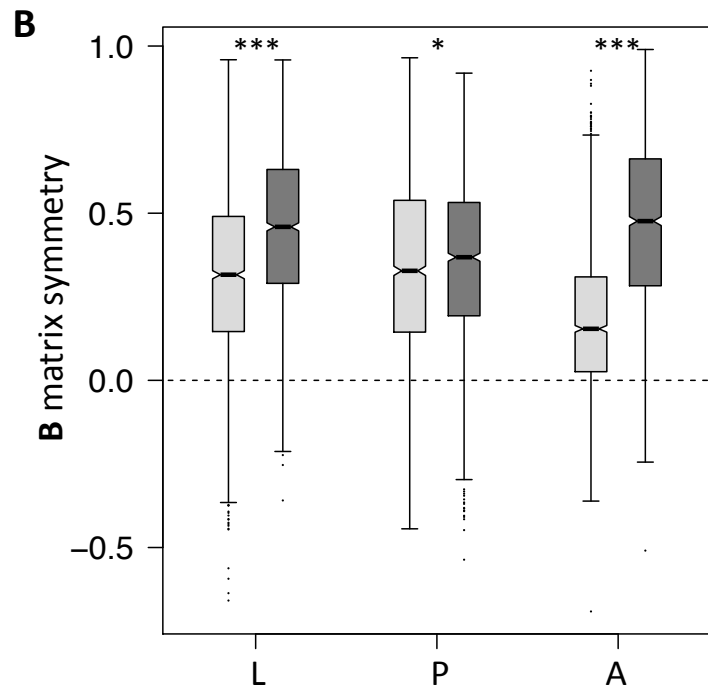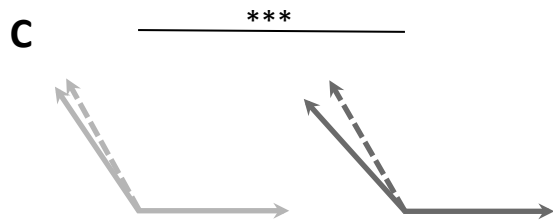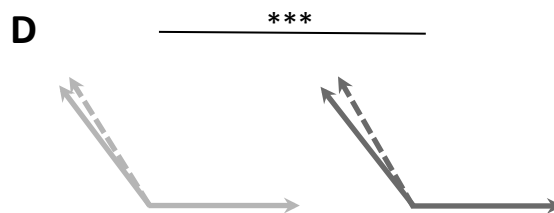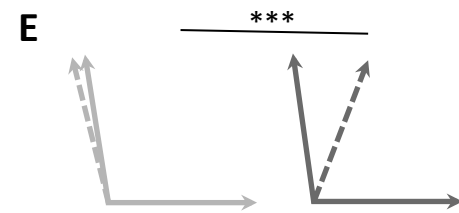

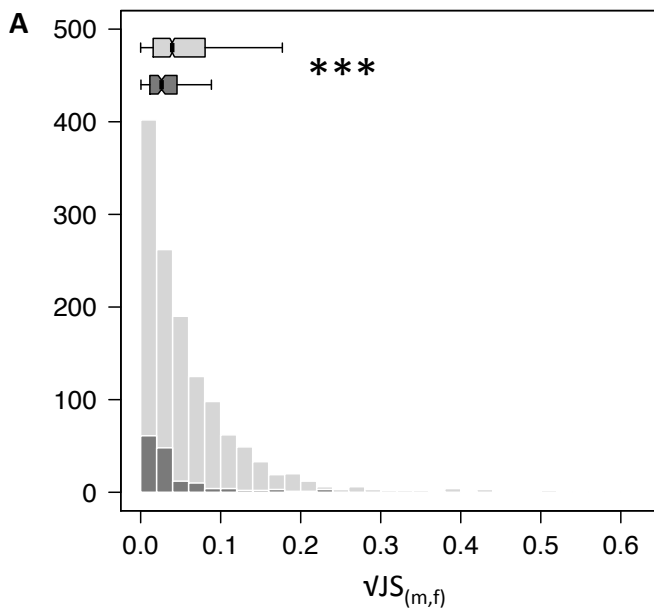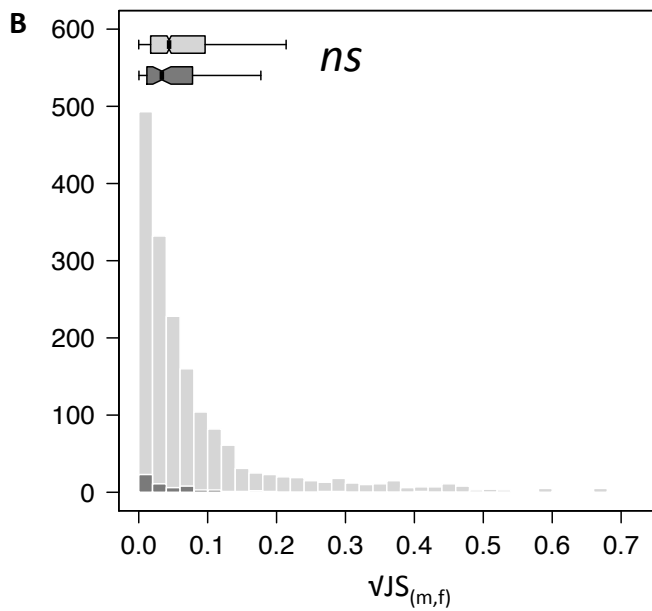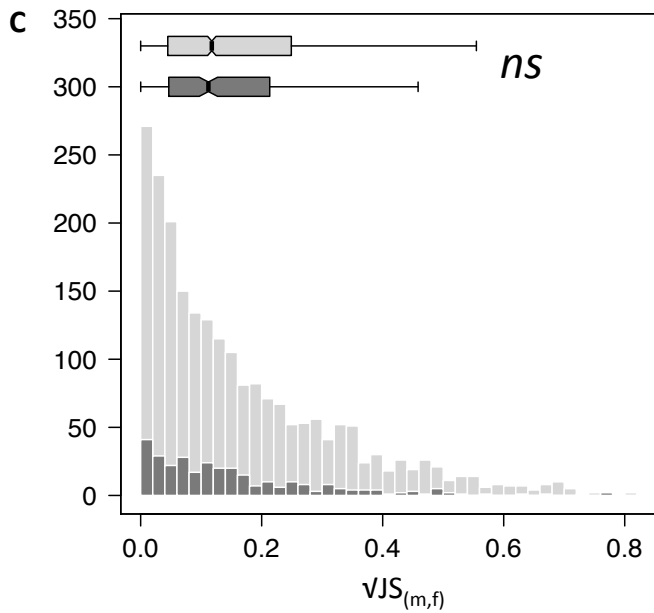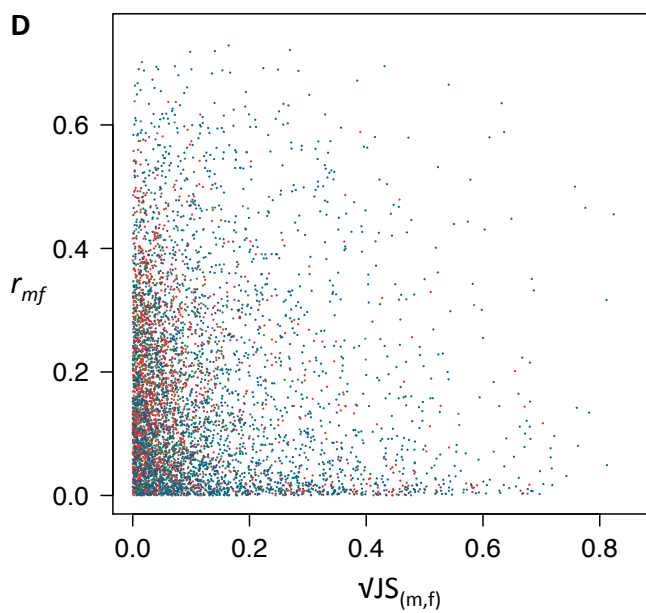

Source: https://www.biorxiv.org/content/10.1101/034728.full.pdf
